# Supplementary material
Source: PubMed Central journal article supplement (PMC10077130)
Supplement: jamasurg-e230284-s002.pdf [file jamasurg-e230284-s002.pdf]

## **Data Sharing Statement**

Meier. Outcomes of Nonoperative vs Operative Management of Acute Appendicitis in Older Adults in the US. *JAMA Surg.* Published April 05, 2023. doi:10.1001/jamasurg.2023.0284

### **Data**

**Data available:** No
